# Supplementary material for: Human resources for maternal and newborn health in Benin, Malawi, Tanzania and Uganda: a policy process-tracing analysis
Source: Research Square preprint supplement (doi:10.21203/rs.3.rs-7337394/v1), 2025-09-15
Supplement: Supplementary file 1 [file 0b5f1d92d83f4a2d8ce407cc.xlsx]

## Sheet: Benin
Country	Document title	Data of publication	Author	MoH website	Document type	Summary of document type and objective	Comments relevant to MNH	Availability	Accessibility	Acceptability	Quality	Mention of international recommendations or decisions	Budget / financing information	HWF focus	Full reference	URL	Notes	include/exclude (reason)
Benin	Politique Nationale de Santé 2018-2030 (National Health Policy)	2018	MoH	www.sante.gouv.bj	MoH policy plan	The aim of the National Health Policy (NHP) 2018-2030 is to guarantee good health for all, to promote the well-being of populations according to their life cycle. Strategic directions: Development of leadership and governance in the health; Service delivery and improving the quality of care; Development of human resources in health; Development of infrastructures, equipment, quality health produc…	High maternal, neonatal, infant and child mortality rates.	Ensuring the availability of qualified and motivated human resources	Improved funding for better universal health coverage. Developing a system to motivate staff in deprived areas involves putting in place a well-defined incentive package, with particular emphasis on premises, materials and equipment, and the availability of basic social services. This system is reinforced by the introduction of a performance recognition and incentive mechanism. In particular, the…		Provision of quality health services, including primary health care, in order to achieving the Sustainable Development Goals (SDG3)	International conventions and declarations to which our country has subscribed with a view to achieving the Sustainable Development Goals (SDGs). GPW 13 (WHO's global programme of work for 2019-2025).	The 2018-2030 NSP will be funded by the State budget, local authorities, the private sector, national and international NGOs and bilateral and multilateral partners.		Ministry of Health Benin. National Health Policy 2018-2030 (Politique Nationale de Santé). Benin: 2018.	https://files.aho.afro.who.int/afahobckpcontainer/production/files/VF_PNS__19_01_2020_VF.pdf	From the document: Ensure the availability of qualified and motivated human resources. Through this objective, the Government is opting to comply with standards in terms of the availability of human resources. To achieve this, it will be necessary to : - ensure the availability of qualified human resources in accordance with standards at all levels of the health pyramid ; - improve the quality an…	Include
Benin	National Health Development Plan 2009-2018 (Plan National de Development Sanitaire)	2009	MoH	www.sante.gouv.bj	MoH strategic plan	By 2025, Benin will have a high-performance healthcare system based on public and private, individual and collective initiatives for the permanent supply and availability of equitable and accessible quality healthcare for people of all categories, founded on the values of solidarity and risk sharing to meet all the health needs of the Beninese people. Reducing maternal and infant mortality, preve…	Reducing maternal and infant mortality, preventing and combating disease and improving the quality of care.	Human resources for health: a quantitative and qualitative shortage of health staff, an extremely inequitable distribution of human resources for health and an ineffective system for evaluating the performance of existing staff. The inadequacy and poor distribution of human resources are seriously limiting the implementation of health system reform in the Health Zones. The staff needed to develop…			One of the major problems in the health sector is the lack of supervision and monitoring of staff who have received on-the-job training, which makes it impossible to assess the impact of the training or to make judicious use of the staff trained. To remedy this situation, the Ministry needs to put in place an effective mechanism for monitoring in-service training. (i) strengthening human resource…		Health funding from external resources should only be complementary to funding from the State's own resources. To this end, advocacy initiatives will be developed with the State and local authorities to encourage greater participation in health funding.	The development of human resources is essential given the process of decentralisation of the health system and the management autonomy granted to decentralised structures. Consequently, the actions to be undertaken will be to strengthen the human resources department and implement the health human resources development plan to meet the needs of the health system. In addition, a mechanism will nee…	Ministry of Health Benin. National Health Development Plan 2009-2018 (Plan National de Development Sanitaire). Benin: 2009.	https://www.uhc2030.org/fileadmin/uploads/ihp/Documents/Country_Pages/Benin/Benin%20Plan%20National%20de%20Developpement%20Sanitaire%202009-2018.pdf	Four problems characterise the human resources situation in the health sector: - a shortage of medical and paramedical staff, particularly specialist staff - inequitable distribution of staff, resulting in a concentration of staff in urban centres to the detriment of rural centres; - low staff motivation; - the mismatch between the output of health professionals and the sector's skill requirement…	Include
Benin	Operational plan to reduce maternal and neonatal mortality in Benin 2018-2022 (Plan operationnel de reduction de la mortalite maternelle et neonatale au Benin)	2018	MoH and Partners	www.sante.gouv.bj	MoH strategic plan	Benin's vision for maternal and neonatal health is: "by 2030, no more deaths in childbirth and that every newborn lives and enjoys good health". The weaknesses identified relate to the lack of ownership of the 2006-2015 maternal and neonatal mortality reduction strategy by operational and intermediate level players, the lack of qualified human resources, the fragmentation of strategy implementati…	Qualified human resources involved in maternal and neonatal health are insufficient. Put in place a political mechanism for the development of human resources specialised in NMR. Reduce the maternal mortality ratio nationally from 347 to 250 deaths per 100,000 live births by 2022; Reduce the neonatal mortality rate nationally from 38 to 25 deaths per thousand live births by 2022.	Put in place a political mechanism for the development of human resources specialised in MNH. Solving the problem of the shortage of qualified human resources, in particular midwives for maternity units declared SONU and paediatricians. Take a political decision to develop human resources specialising in RMMN (obstetricians and gynaecologists, paediatricians, surgeons, intensive care anaesthetist…	Equipping health facilities with appropriate equipment. Distribute health workers equitably at all levels of the health pyramid. The 48 hospitals approved for free caesarean sections must offer 24/7 EmONC.		Improving the practice of midwifery in order to acquire the necessary skills.		Summary of the costs of implementing the NMR operational plan by health system level and by Specific Objective. The plan will be funded by the State budget, local authorities, national and international NGOs and bilateral and multilateral partners.		Ministry of Health Benin. Operational plan to reduce maternal and neonatal mortality in Benin 2018-2022 (Plan operationnel de reduction de la mortalite maternelle et neonatale au Benin). Benin: 2018.	https://www.prb.org/wp-content/uploads/2020/06/Benin-Plan-Operationnel-de-Reduction-de-la-Mortalite-Maternelle-et-Neonatale-au-Benin.pdf		Include

## Sheet: Malawi
Country	Document title	Data of publication	Author	MoH website	Document type	Summary of document type and objective	Comments relevant to MNH	Availability	Accessibility	Acceptability	Quality	Mention of international recommendations or decisions	Budget / financing information	HWF focus	Full reference	URL	Notes	include/exclude (reason)
Malawi	Malawi human resources for health strategic plan, 2018 – 2022	2018													Ministry of Health. Malawi human resources for health strategic plan, 2018 – 2022. Lilongwe, 2018		Not public available but several papers have reference to this document.	Not available
Malawi	Human Resources for Health Strategic Plan 2012 - 2016. Draft.	2012	MoH	https://www.health.gov.mw/	MoH strategic plan	The HR strategic plan overall aim is: To have a health sector with highly competent, motivated, adequate and equitably distributed Human Resources for Health that is effectively contributing to a healthy and productive life of the people in Malawi. The HRH Strategic Plan is guided by seven key strategic objectives in ensuring that human resources for health are adequate, properly trained and remu…	"…..Some of our vital indicators like the Maternal Mortality Rate (MMR) and Infant Mortality Rate (IMR) are unacceptably high and must be tackled aggressively if we are to sustain the nation’s stability".	Improve data management capacity to provide accurate and timely information on numbers, cadres, qualifications, deployment, transfer and attrition of health staff in order to make effective HR decisions. Establish evidence-based staffing norms for all levels of human resources for health based on workload analysis. Recruit staff according to staffing norms for all cadres. Lobby for improved staff…	Explore cost-effective and continuation mechanisms for equitable incentive packages for tutors, taking into consideration placement (e.g. urban vs. rural). Develop/review policies/guidelines on management of locum, relief and other incentive schemes to ensure equity and cost-effectiveness. Adequate and equitable distribution of Human Resources for Health		• Increase the number of key health workers being trained at HTIs. • Increase the number of tutors and clinical instructors being trained. • Lobby for establishment of a loan scheme to support student fees and institute policy/guidelines to enforce bonding mechanism for tracking of students funded by government and other donor partners. • Support regulatory bodies in the rolling out of continuing…	MDG, Aid Effectiveness signed in Paris, Accra and Abuja.	Implementation of the Human Resource Strategic Plan is a major undertaking of the Ministry of Health and will require massive budget allocation. Draft budget included.	See also under "Quality". • Training and staff development • Improving recruitment • Developing mechanisms for deployment • Improving retention • Performance management and career development • HR policy and systems development • Communication and information sharing • Improving tools for research and development • Management and leadership development • Coordination and harmonization of HRH mech…	Ministry of Health. Malawi. Malawi human resources for health strategic plan, 2018 – 2022 (Draft). Lilongwe: 2018..	https://www.health.gov.mw/	Draft implementation timeline of key strategic interventions included but no specific details.	Include
Malawi	Human Resources for Health Malawi Country Profile 2010	2010	MoH	https://www.health.gov.mw/	Country profile	This HRH Malawi Country Profile is meant to be a reference document to provide the stakeholders in the health sector with the current HRH situation in Malawi										https://www.health.gov.mw/	Not sure we should include this but it speaks to insurance. At the moment, there is no social health insurance system operating in Malawi. However private health insurance exists, but to a small degree largely due to the state provision of free health care and financing of health services, and in part due to the high levels of poverty. In recent years, however, private health insurance is becomin…	Exclude - Country Profile only
Malawi	Health Sector Strategic Plan II 2017-2022. Towards Universal Health Coverage	2017	MOH	https://www.health.gov.mw/	Strategic Plan	The objectives of the HSSP II focus on two main aspects: strengthening health systems for the delivery of an essential health package and tackling social determinants of health. They are as follows: 1) Increase equitable access to and improve quality of health care services 2) Reduce environmental and social risk factors that have direct impact on health 3) Improve the availability and quality of…	Health care quality is hampered by the cross-cutting health care system inputs outlined in this section. Worth of mention, however, are factors such as weak leadership, inadequate human resources for health, uncoordinated and weak social accountability mechanisms, poor clinical practices, insufficient client safety systems as well as lack of patient feedback mechanisms on the quality of care rece…	Improve recruitment capacity. Strengthen the human resource planning process to incorporate evidence based planning. Improve retention of properly deployed and motivated health workforce.	To ensure timely universal free access to a quality Essential Health Package, irrespective of ability-to-pay, to all the people in Malawi. Ensure availability of quality infrastructure. Strengthen transport system at all levels. Design options for pooling health financial resources and implement sustainable and risk-based financing schemes.		Enforce public service policies, regulations and procedures. Improve quality and coordination of training. Enhance capacities in leadership and management (e.g. conduct a feasibility study into developing a health management curriculum at pre-service, master’s and doctorate levels).		The assessment of the feasibility of health financing reforms such as the National Health Insurance Scheme and Health Fund have made clear that, in the medium term, the capacity and scope for domestic revenue raising is limited. Likewise, given the global climate it is highly unlikely that Development Partners funding will increase in the medium term, on the contrary, there is a possibility it ma…		Ministry of Health Malawi. Health Sector Strategic Plan II 2017-2022. Towards Universal Health Coverage. Malawi: 2017.	https://www.health.gov.mw/		Include
Malawi	Health Sector Strategic Plan 2011 - 2016. Moving towards equity and quality	2011	MOH	https://www.health.gov.mw/	Strategic Plan	• Health facilities including staff houses constructed and rehabilitated especially in under- served communities. • Service Level Agreements implemented in identified areas. • Emergency transport provided. • Sufficient skilled human resources for health trained, recruited and retained in the health sector. • Quality medical equipment provided and maintained. Essential medicines and supplies made …	Reduction in maternal and newborn health. Lack of access to health facilties.	The human resource challenges remain both acute and complex and HR projections show that at current output levels it will take many years to come anywhere near the numbers of health staff needed to provide minimum standards of service delivery. Shortage of human resources and inequitable distribution. Sufficient skilled human resources for health trained, recruited and retained in the health sect…	Emergency transport provided. Quality medical equipment provided and maintained. Essential medicines and supplies made available all the time.		Lack of capacity of training institutions to fulfil human resource needs of MoH. Review existing in-service training schemes, pilot new in-service training methods including mentoring and coaching, and tailor in-service training for particular needs (e.g. for newly appointed health care workers at rural health centres, including support staff). Support the rolling out of continuing professional d…			Improved availability of Human resources for health sector: Pre-service training Tutors Post graduate training Recruit and pay staff at all levels Capacity Building HR Planning and management	Improve retention of properly deployed and motivated health workforce Improve recruitment capacity Enforce implementation of performance based management Enforce public service policies, regulations and procedures Improve quality and coordination of training Strengthen the human resource planning process to incorporate evidence-based planning			Include
Malawi	Health Sector Strategic Plan III 2023-2030. Reforming for Universal Health Coverage.	2022	MOH	https://www.health.gov.mw/	Strategic Plan	The Health Sector Strategic Plan III (HSSP III) outlines the objectibes, strategies and activities needed to build upon progress during implementation of the Health Sector Strategic Plan II (HSSP II) and accelerate Malawi's progress in achieving Malawi's Universal Health Coverage (UHC) targets by 2030. Objectives: 1. Service Delivery: Increase equitable access to and improve quality of health car…	Reduction in neonatal mortality rate from 27.9 deaths per 1,000 live births in 2010 to 19.1 deaths per 1,000 live births in 2020 Progress in maternal, neonatal and child health (MNCH) services especially through sustained high rate of coverage of high impact preventive and curative health interventions At the start of HSSP II in 2017, only 24% of the pregnant women had their first antenatal visit…	Improve the availability of health infrastructure at all levels of health care Improve the availability of competent and motivated human resources for health Construct new health infrastructure to meet service delivery needs Enhance recruitment, selection, deployment and equitable distribution of human resources for health Provide competetive remuneration, benefits and working conditions for HRH …	Improve the accessibility of healthcare infrastructure at all levels of health care Increase equitable access to health care All people receive the same high quality health care regardless of geographic location or socio-economic factors. Strengthen transport and referral at all leavels of the healthcare system	Client centeredness: Service provision will be considerate of the people's personal circumstances, preferences, values, family situations and lifestyles.	Improve quality of health care services Pre-service training programs should be coordinated and meet quality standards that are in alignment with long term HRH recruitment requirements Enforce accreditation standards at training institutions and throughout the health sector Improve staff development strategies e.g. proper orientation to role, CPD system aligned to service needs Strengthen and enf…	WHO Building Blocks Framework Refers to the SDGs	Financial costs of implementing the plan are estimated	Increase the production of the health workforce Decentralize recruitment to sub-national levels Ensure equitable deployment of health care staff aligned with demand for health services Pre-service training programmes coordinated and meet quality standards Offer fair and formalized employment package including clear roles and expectations, guidelines with coordinated career pathways for growth and…	Government of the Republic of Malawi. 2022. Health Sector Strategic Plan III 2023-2030. Reforming for Universal Health Coverage. First Edition	https://www.health.gov.mw/hsspiii/		Include
Malawi	National Health Policy "Towards Universal Health Coverage" 2018-2030	2018	MoH	https://www.health.gov.mw/	Guidance document	Provides direction on key issues that are central to the development and functioning of the health system in Malawi. Broad policy objectives: i) Improve service delivery by ensuring Universal Health Coverage of essential health care services, paying particular attention to vulnerable populations. ii) Promote preventive health at all levels of the health care system, reduce risk factors, and addre…	The maternal mortality ratio (MMR) declined from 984 per 100,000 live births in 2004 to 439 per 100,000 live births in 2016 while the infant mortality rate (IMR) decreased from 104 deaths per 1,000 live births in the year 2000 to 42 per 1,000 live births in 2016. The neonatal mortality rate has gone down from 42 deaths per 1,000 live births in the year 2000 to 27 deaths per 1,000 live births in 2…	Improve availability of competent and motivated human resources for health Institutionalize implementation of regular comprehensive HRH assessments and analyses to inform the development of periodic HRH production, recruitment and management strategies for the health sector. Conduct periodic reviews of the establishment to analyse how it compares with the HRH needs. Strengthen recruitment and dep…	Develop and implement appropriate referral systems Government will ensure that every sub-population has access to a health facility offering quality EHP (Essential Health Package) within a radius of 5km.		Reinforce adherence to, and implementation of, policies, guidelines and protocols to effectively guide the health system Stengthen stewardship and governance of HRH to ensure adherence to regulations and professional work ethics at all levels of the health system Produce relevant numbers and cadres of health workers (pre-service) in line with projected needs and competency requirements for each l…	Refers to MDGs and SDGs Ouagadougou Declaration on Primary Health Care and Health Systems in Africa (2008) Paris Declaration on Aid Effectiveness (2005) Abuja Declaration (2001)	Plans for financing laid out	Reviewing HRH requirements and allocating staffa according to need Training - both pre-service and in-service to ensure a competent workforce	Ministry of Health Malawi. National Health Policy - Towards Universal Health Coverage. Malawi: 2018.	https://www.health.gov.mw/download/national-health-policy-2/?wpdmdl=3850&refresh=65a56b3e472551705339710		Include

## Sheet: Tanzania
Country	Document title	Data of publication	Author	MoH website	Document type	Summary of document type and objective	Comments relevant to MNH	Availability	Accessibility	Acceptability	Quality	Mention of international recommendations or decisions	Budget / financing information	HWF focus	Full reference	URL	Notes	include/exclude (reason)
Tanzania	The Tanzania Quality Improvement Framework in Health Care 2011-2016	2011	Ministry of Health and Social Welfare	No	Guidelines/Recommendations	Objectives of the Tanzania Quality Improvement Framework: 1. Effectively give technical advice or guidance on quality improvement of health care services 2. Advocate and inform stakeholders for enhancement and sustainability of quality improvement in health care services 3. Advocate to the public and other stakeholders their roles and responsibilities to ensure and sustain quality improvement of …	One of the health service goals identified is the reduction in infant and maternal mortality rates by three quarters of current levels in 1998.	Increase the proportion of skilled staff working in areas Improvement of work environment and occupational safety	Strengthen referral systems Enhancing integration, sustainability and equity in health care	Enhance integration, sustainability and equity in health care Address community health problems	Strengthen leadership, structures and mechanisms that will develop, implement and sustain QI Improve environmental health, hygiene and sanitation Strengthening supportive supervision, monitoring and surveillance	Refers to National Plans that are committed to achieving the MDGs		To improve health workers productivity and increase the proportion of skilled staff in working places Consideration will also be given to mainstream community health workers into the health system to support primary health care facilities with promotional and preventive services MoHSW plan to integrate training programs through the ZHRC’s with a view to provide training that will prepare health w…	Ministry of Health and Social Welfare United Republic of Tanzania. The Tanzania Quality Improvement Framework in Health Care 2011-2016. Dar es Salaam: 2011.	https://platform.who.int/data/maternal-newborn-child-adolescent-ageing/national-policies		Include
Tanzania	Human resource for health and social welfare country profile 2013/2014	2014	Ministry of Health and Social Welfare	MoH website	Report	.	The Health Sector in Tanzania has some of the health indicators which the sector is not doing well the particular ones are those related to maternal and child health. One of the factors explaining this situation is the weak health systems including the low quality of health services offered and the inadequacy of skilled health workers available.								Human resource for health and social welfare country profile 2013/2014. Ministry of Health and Social Welfare. Dar es Salaam, Tanzania; 2014.	https://www.moh.go.tz/		Exclude - Country profile only
Tanzania	Human resource for health and social welfare strategic plan 2014-2019	2014	Ministry of Health and Social Welfare	Ministry of Health	MoH strategic plan	Strategy document aimed at improving the the HRH&SW situation in Tanzania. Guiding document for the health sector in proper planning, development, management and effective utilization of human resources. Reviews recent history with regard to HRH Strategic Objectives identified in the report 1. Strengthen HRH&SW policy development and planning at all levels 2. Strengthen HRH&SW research and utiliz…	In spite of a decline in infant and under five mortality, overall Maternal Mortality Ratio (MMR) and prevalence of other major diseases like HIV/AIDS, Malaria and Tuberculosis remain high.	Strengthen HRH&SW policy development and planning at all levels Strengthen HRH&SW recruitment, retention, career development and utilization at all levels Aim to reduced shortage of staff from 52% in 2014 to 30% in 2019 Increase amount of graduates from 7000 in 2014, to 10,000 in 2019 Retain 70% of posted staff within the health sector	Ensure equity distribution of health workers at all levels		Increase and standardize production and quality of HRH&SW Improve curricula for training programs Enhance quality and effectiveness of CPD Improve collaboration between MoHSW, professional bodies and NACTE in accrediting and regulating health and social welfare training institutions	Refers to MDG targets (including targets for maternal mortality)	Discusses expected financing mechanisms aimed to meet the costs of increasing health personnel. Provides budget estimates for costs associated with strategic objectives	Vision Statement: Making Tanzania a country with adequate health workforce with diversified competencies and motivated to deliver quality health and social welfare services. .	Strengthen HRH&SW recruitment, retention, career development and utilization at all levels Increase and standardize production and quality of HRH&SW	https://www.moh.go.tz/report		Include
Tanzania	Health Sector Strategic Plan July 2015 - June 2020 (HSSP IV)	2015	Ministry of Health and Social Welfare	WHO/OMS Extranet Systems	MoH strategic plan	The HSSP IV has been developed to guide the continued transformation of the health sector, to address the unfinished MDG agenda, and the increasing demand for decentralised, affordable, equitable and quality health services in a performance-oriented mode. Provides overview of current status in terms of HRH and outcomes. Objectives: 1. The health and social services sector will achieve objectively…	In relation to current status: "The trends in Neonatal Mortality and Maternal Mortality are also downwards, but less, and not meeting MDG targets." "Reproductive, Maternal, Neonatal, Child, and Adolescent Health (RMNCAH) in general is performing less effectively than control of communicable diseases. Overall service utilisation is not reaching the required level." "Reproductive Health Services (R…	Plan, train and increase the number of competent health staff for all levels of health care	100% balanced distribution of skilled health workers at primary level in targeted underserved regions. Redistribution of HRH to ensure adequate staffing in all health care facilities in all regions Equitable access - focus on geographical areas with highest disease burden and focusing on vulnerable groups with higher risks	Meet the expectations of the population in health care service Human rights based approach in health programmes - revitalising the Client's Charter	Performance management systems to motivate staff to provide quality service. Measures to ensure accountability, deterring pilferage and corruption	Refer to progress made towards MDGs SDGs have provided input into planning process for this strategic plan	"The new health care financing strategy, which promotes the development of a single national health insurance with effective risk-pooling and social protection, will increase the affordability of health care, also for the poorer citizens, and will enhance sustainable development of the health care sector." "Strategic Direction: Cost-effective, quality health services should be available to all re…	Distribution of health workers across all areas including remote and rural areas. Focus on quality in order to improve outcomes of health care and social welfare services and to enhance trust within the population. A series of measures will make the quality of health care visible, more acceptable to users, and safer for both clients and health workers.	Ministry of Health and Social Welfare United Republic of Tanzania. Health Sector Strategic Plan July 2015 - June 2020 (HSSP IV). Dar es Salaam: 2015.	https://dc.sourceafrica.net/documents/118198-Tanzania-Health-Sector-Strategic-Plan-July-2015.html		Include
Tanzania	National Human Resources for Health Strategy 2020-2025	2020	Ministry of Health, Community Development, Gender, Elderly and Children	Ministry of Health, Community Development, Gender, Elderly and Children	MoH strategic plan	Strategy document that aims to identify HRH gaps and ensure investment is appropriately managed to support the reduction in these gaps. Reviews recent history with regard to HRH Strategic Objectives: 1. Strengthen the HRH planning in line with MOHCDGEC functional mandates and in decentralized settings of health service delivery by 2020 2. Improve availability of qualified and competent human reso…	The declining scenario of midwifery workforce and death of newborns and mothers while giving birth calls for increased investment in the midwifery workforce.	Strengthen HRH planning Improve availability of qualified and competent human resources at all levels Recruitment requirements for new hospitals, areas where there are shortages, as well as recruitment for health training institutions Retention Improve working environment, living conditions	Strengthen HRH planning Improve availability of qualified and competent human resources at all levels Ensuring recruitment to areas where HRH density is below national average Equitable distribution of health workers		Improve learning environment of health training institutions (curriculum, faculty, competence based curriculum) Enhance in-service and continuing education program in response to actual HRH and health sector needs	World Health Assembly, Global Strategy for Human Resources for Health (2014) SDGs	Strengthen mobilization of HRH financing from government, local based community stakeholders such as WDC, business companies (corporate social responsibility resource mobilization) and development partners locally and internally to adequately implement HRH interventions by 2025	Improve availability of qualified and competent human resources at all levels to adequately correspond with current and future health sector needs 2025 Improve the recruitment, deployment and retention of health workers through the use of context specific sound interventions to ensure equitable (need based) distribution of health work force at all levels of the health sector by 2025. Specifically…	Ministry of Health United Republic of Tanzania. National Human Resources for Health Strategy 2020-2025 Dar es Salaam: 2000.	https://tzdpg.or.tz/storage/2022/04/National-HRH-Strategy-2021-2026.pdf		Include
Tanzania	Health Sector Strategic Plan July 2021 - June 2026 (HSSP V) Leaving No One Behind	2021	Ministry of Health, Community Development, Gender, Elderly and Children	Mwanza Intervention Trials Unit	MoH strategic plan	Guiding document to advise on targets for delivery of health care. Gives an overview of recent history and current position. Vision: To have a healthy and prosperous society that fully contributes to the development of individuals and the nation Mission: Providing sustainable health services with standards that are acceptable to all citizens without financial constraints, based on geographical an…	"Services for pregnant and childbearing women, and neonates have improved considerably in the HSSP IV period. But further reduction of neonatal and child mortality rates is needed for achieving the SDG targets." "The number of pregnant women delivering with skilled birth attendance has increased from 51% in 2015 to 79% in 2019. The number of health facilities providing comprehensive emergency obs…	"The Government will ensure availability of essential primary health care services with acceptable quality standards throughout the country with respect to geographical, population, gender, disability, and burden of disease" Retention will be addressed	Government will equip health facilities for provision of equitable primary health services. Geographical, social-cultural and financial barriers in accessing quality and people-centred basic health services for all people are being addressed. Strategic Outcome: Organizing health services Improved organisation of the health facilities, with adequate referral Strategic Outcome: UHC1 Geographical, s…	The health sector aims to provide people-centered care.	The health sector will focus on improving quality of care through health system-level improvements. For health facilities to be able provide the required services, government will strengthen the system for competence-based service delivery through improving pre-service training, CPD, and a mentorship system in clinical settings. The government will also improve nursing and midwifery care to impro…	Refers to SDGs Agenda 2063: The Africa We Want (African Union)	The government will continue to increase domestic funding in the health sector budget with a view to meeting high priority needs in line with the overall country's priorities. Estimates provided for costs of implementing HSSP V.	Availability of health workforce so that coverage is equitable Quality care that is person centered	Ministry of Health and Social Welfare United Republic of Tanzania. Health Sector Strategic Plan July 2021 - June 2026 (HSSP V) Leaving No One Behind. Dar es Salaam: 2021.	https://mitu.or.tz/wp-content/uploads/2021/07/Tanzania-Health-Sector-Strategic-Plan-V-17-06-2021-Final-signed.pdf		Include
Tanzania	National Five Year Development Plan 2011/2012-2015/16 "Unleashing Tanzania's latent growth potentials"	2011	United Republic of Tanzania President's Office, Planning Commission	Development Partners Group Tanzania	Guidelines/Recommendations	First of three National Development plans designed to implement the Tanzania Development Vision 2025 - aiming to transform Tanzania into a middle-income country by 2025. Goals for health: 1. Increase accessibility to health services based on equity and gender-balanced needs 2. Improve quality of health services 3. Strengthen management of the health system 4. Strengthen execution management of po…	The maternal mortality ratio has declined from 578 per 100,000 livebirths in 2004/5 to 454 per 100,000 live births in 2009/10. However, the benchmark for lower middle-income countries is 260 per 100,000 live births, which shows Tanzania's achievement is not satisfactory. The infant mortality rate declined from 68 per 1,000 live births in 2004/05 to 51 per 1,000 live births in 2009/10. Target laid…	Enhance human resource development for health and social welfare	Increase accessibility to health services based on equity and gender-balanced needs		Improve quality of health services	Refers to MDGs	Discusses plans for securing finance to support the implementation of the five year plan. Estimated costs of achieving health goals estimated (TShs. 2,765,911 million)	Increase student enrolment in health profession (strategic intervention in relation to education)	Ministry of Health and Social Welfare United Republic of Tanzania. National Five Year Development Plan 2011/2012-2015/16. Unleashing Tanzania's latent growth potentials. Dar es Salaam: 2011.	https://tzdpg.or.tz/wp-content/uploads/2022/06/National-Five-Year-Development-Plan-I-FYDP-I-2011-2016.pdf		Exclude - not specific to health and limited HRH information.
Tanzania	National Five Year Development Plan 2016/17-2020/21 "Nurturing Industrialisation for Economic Transformation and Human Development"	2016	Ministry of Finance and Planning	MOH/WHO	Guidelines/Recommendations	Second of three National Development Plans designed to implement the Tanzania Development Vision 2025. Health related issues raised in the plan: Raise availability and quality of (health) services required by an individual and society at large for self-propelling improvement inequality livelihood. Notable gaps in numbers of health and welfare professionals. The future approach to skills developme…	Maternal mortality rate also declined from 578 per 100,000 live births (2004) to 454 deaths per 100,000 (2013). However, the rate remains far away from the MKUKUTA II’s target of 265 deaths per 100,000 live births. Lays out targets for: Infant mortality (42 per 1,000 births by 2020/21 and 40 per 1,000 births by 2025/26) Births attended by a skilled health worker [percentage] (75% by 2020/21 AND 9…	Construct new dispensaries, health centres and hospitals and equip them appropriately				Refers to SDGs	Discusses financing strategy	Short and long term training to health staff in referral, specialized and national hospitals Long course training for health professionals	Ministry of Health and Social Welfare United Republic of Tanzania. National Five Year Development Plan 2016/17-2020/21. Nurturing Industrialisation for Economic Transformation and Human Development. Dar es Salaam: 2016.	https://extranet.who.int/nutrition/gina/sites/default/filesstore/FYDP2_II__April%201.pdf		Exclude - not specific to health and limited HRH information.
Tanzania	National Five Year Development Plan 2021/22 - 2025/26 "Realising competiveness and industrialisation for human development"	2021	Ministry of Finance and Planning	Ministry of Finance and Planning website/MOH	Guidelines/Recommendations	Third of the three National Development Plans designed to implement the Tanzania Development Vision 2025. Key interventions related to health: i) Construct and rehabilitate inclusive health facilities; ii) Ensure availability of medicine, medical supplies, reagents, vaccine and pharmaceutical equipment; iii) Promote and increase scope, as well as coverage of health insurance schemes; iv) Strength…	During 2019/20, 81 percent of all pregnant women made four (4) or more visits at antenatal clinics compared to 39 percent in 2015/16 implying that more pregnant women receive quality care and advice on safe birth control methods. The number of pregnant women giving birth at health facilities increased from 64 percent in 2015/16 to 83 percent in 2019/20. Lays out targets for: Infant mortality rate…		Construct and rehabilitate inclusive health facilities			Refers to SDGs	Discusses financing strategy	Strengthen specialized and super-specialized services in all zonal, specialized and national referral hospitals	Ministry of Health and Social Welfare United Republic of Tanzania. National Five Year Development Plan 2021/22 - 2025/26. Realising competitiveness and industrialisation for human development. Dar es Salaam: 2021.	https://www.tro.go.tz/wp-content/uploads/2021/06/FYDP-III-English.pdf		Exclude - not specific to health and limited HRH information.

## Sheet: Uganda
Country	Document title	Date of publication	Author	MoH website	Document type	Summary of document type and objective	Comments relevant to MNH	Availability	Accessibility	Acceptability	Quality	Mention of international recommendations or decisions	Budget / financing information	HWF focus	Full reference	URL	Notes	include/exclude (reason)
Uganda	Second National Health Policy (NHP II)	2010	Ministry of health	https://www.health.go.ug/	Health Policy	I. Strengthening health systems in line with decentralisation through training, mentoring, technical assistance and financial support. ii. Re-conceptualising and organising supervision and monitoring of health systems at all levels in both public and private health sectors and improving the collection and utilisation of data for evidence-based decision making at all levels. iii. Establishing a fu…	The minimum health care package in Uganda shall consist of the most cost-effective priority healthcare interventions and services addressing the high disease burden that are acceptable and affordable within the total resource envelope of the sector including Maternal and Child Health. Shortage of critical staff especially midwives, doctors, nutritionists, anaesthetists, pharmacists, pharmacy assi…	Strengthen human resource planning in the health sector. Produce, recruit and retain more health workers with appropriate professional mix in partnership with the private sector. Strengthen management and leadership skills at all levels in public and private sectors to ensure effective planning and efficient management of resources.		To increase motivation, productivity, performance, integrity and ethical behaviour of human resource through the development and efficient utilisation of the health workforce. Strengthen enforcement of professional standards and develop effective ways of increasing health workers accountability towards client communities.	Review curricula and training strategies to enable health workers cope with emerging health problems, approaches and challenges. Re-define the institutional framework of health workers’ training institutions including the mandate, leadership and coordination mechanisms among all stakeholders. Ensure provision of appropriate remuneration of health workers. Strengthen supportive supervision and per…				Ministry of Health Uganda. Second National Health Policy (NHP II) 2010. Uganda: 2010.	https://www.health.go.ug/		Include
Uganda	Health Financing Strategy 2015/16 – 2024/25	2015	Ministry of health	https://www.health.go.ug/	Strategic plan			Although the role of recruiting and managing human resources has been decentralized, some districts, especially in the rural areas, have had challenges attracting staff resulting into inequalities in human resource distribution.										Exclude - not a strategy/guidance documents about health care
Uganda	Ministry of Health Strategic Plan 2020/21 - 2024/25	2020	Ministry of health	https://www.health.go.ug/	Strategic plan	1. To strengthen health sector governance, management and coordination for UHC. 2. Strengthen human resources for health management and development. 3. Increase access to nationally coordinated services for communicable and non- communicable disease / conditions prevention and control. 4. Strengthen disease surveillance, disaster response and epidemic control at national and sub-national levels. …		Strengthen human resources for health management and development. Level of absenteeism of MoH staff without reason. Ensure adequate human resources for health at all levels, with special focus on specialized and super specialized human resource.					Financing framework included.	"....Despite this progress, the sector still has some weaknesses. While there is a commendable increase staffing levels, this is not commensurate with the increasing population. At MoH Headquarters, a quarter of the approved positions (25%) are not substantively filled, which consequently affects the functions of MoH that include stewardship, policy initiation and supervision of health service de…	Ministry of Health Uganda. Ministry of Health Strategic Plan 2020/21 - 2024/25. Uganda: 2020.			Include
Uganda	Strategy for improving health service delivery 2016-2021	2016	Ministry of health	https://www.health.go.ug/	Strategic plan	To improve the management of health resources for effective health service delivery. • Critical policy inadequacies identified, specific interventions articulated and implemented • Structural inefficiencies identified, and appropriately addressed • Professional/technical deficiencies, unethical and corrupt Behaviour identified and appropriate measures put in place to curb the vices.		Reduce absenteeism			In order to ensure production of quality health professionals that are competent and competitive within the East African Region and internationally, Ministry of Health and Ministry of Education and Sports will urgently; • Develop a standard criteria of entry for all cadres of health professionals for pre service training. • Regulate intake into the pre service Health Training Schools to match exi…				Ministry of Health Uganda. Strategy for Improving Health Service Delivery 2016-2021. Uganda: 2016.	https://www.health.go.ug/		Include
Uganda	Implementation Framework for the Integrated Human Resources for Health Information System in the Health Sector	2017	Ministry of health	https://www.health.go.ug/	Implementation Framework	To achieve these specific objectives focus was placed on; a. Improving timely availability of accurate and up to date HRH data for policy, planning and management. b. Tracking the health workforce as they move through the health system c. Increasing efficiency in the management and maintenance of Health Workforce data d. Quickening aggregation, analysis and use of data e. Enhancing information fl…												Exclude - focus on information systems.
Uganda	Human Resources for Health Strategic Plan 2020-2030 "Effective health workforce coverage and resilience"	2021	Ministry of health	https://www.health.go.ug/	Strategic plan	The purpose of the HRH strategic plan is to provide a framework for planning, developing and managing a well performing health workforce in Uganda. Mission:To build resilient and responsive HRH system for sustainable development, availability and accessibility of competent motivated health workforce for quality health services and improved health outcomes Goal:To develop and maintain a well-perfo…	Uganda still has high burden of maternal and new-born mortality. About 4 of every 100 infants die mainly due to neonatal conditions and prematurity. More than one of every five children who die before their fifth birthday, die before one month of age. On average 10-13 mothers die every day while giving birth. These mothers die mainly from hemorrhage (46%), hypertensive disorders (11%), puerperal …	Strengthen human resource management (HRM) capacity for HRH analysis, planning, budgeting and management for an effective health workforce at all levels Recruit and retain 30,066 staff to fully functionalize the staffing structures at national, regional, district and lower-level facilities Strengthen career management to improve motivation, retention, and development of the health workforce Reduc…	Health workforce accessibility strengthened by equitable deployment	Improving acceptability of workforce is mentioned, but no plans or examples of how to do this are given	Review and update accreditation and categorization of both government and private health facilities annually to harmonize staffing standards and service delivery standards Assess alignment of staffing standards to changes in health needs and services nationally every five years Institute recognition, prompt feedback and rewarding of individual and team performance Establish a system of staff rota…	Refers to SDGs	Costings for the strategic plan are estimated	Recruitment Retention Distribution Training	Republic of Uganda, Ministry of Health. 2021. Human Resources for Health Strategic Plan 2020-2030. Effective health workforce coverage and resilience.	https://www.health.go.ug/wp-content/uploads/2021/07/HRH-Rollout-Plan-2020-2025-002.pdf	This document provides guidance on how to achieve overall goal. E.g. Where it talks about reduce absenteeism, the following guidance is given: i) Scale-up and maintain absenteeism tracking and reporting at all levels ii) Institute mechanisms to link attendance to duty with individual outputs and results iii) Institute measures to link pay to attend to duty and performance	Include
Uganda	Health Sector Development Plan 2015/2016 -2019/20	2015	Ministry of health	www.health.go.ug	Guidance document	The HDSP 2015/16- 2019/20 is the second in a series of six 5-Year Plans aimed at achieving Uganda Vision 2040 of a healthy and productive population that contributes to socio-economic growth and national development. Key objectives: i) contributing to the production of a healthy human capital for wealth creation through provision of equitable, safe and sustainable health services ii) increasing f…	The achievements realized under HSSIP include among others: reduction in maternal mortality ratio from 438/100,000 (UDHS) live births in 2011 to 360/100,000 (WHS estimates) live births in 2014 and reduction in infant mortality rate from 71/1000 live births in 2006 to 54/1000 live births in 2011 and 45/1000 (WHS estimates) in 2014. Over this Plan period the sector will focus on attaining the follo…	To ensure adequate and appropriate Human Resource for Health (HRH) service delivery Targets: To have 80% of approved posts in public facilities filled with qualified personnel by 2019/20 To have Doctors 1:23,500 Midwives 1:9,500 Nurses 1:17,000 by 2019/2020 The workforce will grow at annual rate of 5% Support the scaling up of production of priority health professionals and super specialized cadr…	To improve access to quality hospital services at all levels in both the public and private sectors. Operationalize the referral framework from community to national levels		Institutionalise QI systems in private and public facilities Work with MoES to review and harmonise education standards and monitoring tools for both public and private health Training Institutions Streamline and design mechanisms for coordinating and expanding access to CPD programmes Restructure the whole health workforce (norms and skill mix) to conform to the revised Expected Standard of Prac…	Ouagadougou declaration on Primary Health Care and Health Systems MDGs and SDGs WHO guiding frameworks on health development	Anticipated costs presented and financing framework included.	The health workforce is still a key bottleneck for the appropriate provision of health services, with challenges in adequacy of numbers and skills, plus retention, motivation, and performance challenges.	Ministry of Health Uganda. Health Sector Development Plan 2015/2016 -2019/20. Uganda: 2015.	https://www.health.go.ug/sites/default/files/Health%20Sector%20Development%20Plan%202015-16_2019-20.pdf		Include
Uganda	Health Sector Quality Improvement Framework and Strategic Plan 2015/16-2019/20 Improving the value of healthcare in Uganda with proven interventions, implemented quality methods. "Our care services" and "Spend to save"	2016	MoH	www.health.go.ug	Strategic plan	The goal of this plan is to ensure that all people in Uganda have access to quality healthcare services by 2020. Strategic Objectives: 1. To strengthen leadership capacity and support for QI throughout the health sector 2. To strengthen organizational capacity for QI implementation in the health sector 3. To improve compliance to the health sector service delivery standards at all levels 4. To st…	Despite significant improvements in skilled assistance at delivery, maternal mortality remains a big challenge with many deaths occurring more than a day after birth.			Institutional capacity building for in patient/ client centered care Promote transparency and accountability of health providers through the client charters	Development of health workers' skills to deliver quality care Increase availability and use of the service delivery standards, evidence-based clinical standards, guidelines, Standard Operating Procedures and tools Strengthen regulatory bodies (UMDPC, AHPC and UNMC) capacity to regulate and over see quality of private health providers and professional ethics and code of conduct of all health worke…	WHO Strengthening health systems to improve health outcomes Reference to progress made towards MDGs	Costing of strategic plan estimated		Ministry of Health Uganda. Health Sector Quality Improvement Framework and Strategic Plan 2015/16-2019/20. Uganda: 2015.			Include
Uganda	National Quality Improvement Framework and Strategic Plan 2021-2025	2021	MoH	www.health.go.ug	Strategic plan	This plan is to be used to promote continuous QI in the priority areas of reproductive, maternal, new-born and child health (RMNCH), tuberculosis (TB), HIV, laboratory, and diagnostic services, in line with Uganda’s commitment to achieving the Sustainable Development Goals (SDGs). Strategic Objectives: 1.To strengthen organisational structures, leadership, and accountability for quality improveme…	The maternal mortality ratio (MMR) decreased from 438 in 2011 to the current 336 deaths per 100,000 live births. Though most maternal deaths are preventable, the mortality rate for women is still high. The three leading causes of maternal deaths are haemorrhage, obstructed labour, and complications from abortion. Almost 28% of maternal deaths in Uganda occur in young women aged 15 – 24 years.			To improve client-centred care at all levels. Up-to-date Client Charters and key messages should be made available and used for improved community engagement.	To improve compliance to the health sector standards at all levels of care. Build capacity of health workers in QI Sharing updates related to content of care, e.g., updated clinical protocols and guidelines, information on new innovations and products. Develop relevant structures, tools, and a mechanism for accreditation of health facilities in Uganda for both public and private health facilities.	Refers to SDGs WHO Handbook for National Policy and Strategy			Ministry of Health Uganda. National Quality Improvement Framework and Strategic Plan 2021-2025. Uganda: 2021	http://library.health.go.ug/sites/default/files/resources/Uganda%20NQIF%20and%20SP%202021-2025%20Final.pdf		Include
