# Supplementary material for: Human resources for maternal and newborn health in Benin, Malawi, Tanzania and Uganda: a policy process-tracing analysis
Source: Research Square preprint supplement (doi:10.21203/rs.3.rs-7337394/v1), 2025-09-15
Supplement: Supplementary file 1 [file 0903f9f3280361b04adb3f9e.pdf]

### Additional file 3. Other policies and strategic plans considering human resources for health

| Country      | Title of policy/<br>strategic<br>plan/year                                                                                                                          | Availability                                                                                                                                                       | Accessibility                                                                                                                                                                                                                                                       | Acceptability | Quality                                                                      | Specific<br>reference to<br>MNH                                                                                 |
|--------------|---------------------------------------------------------------------------------------------------------------------------------------------------------------------|--------------------------------------------------------------------------------------------------------------------------------------------------------------------|---------------------------------------------------------------------------------------------------------------------------------------------------------------------------------------------------------------------------------------------------------------------|---------------|------------------------------------------------------------------------------|-----------------------------------------------------------------------------------------------------------------|
| <b>Benin</b> | National Health Development Plan 2009-2018 (Plan National de Development Sanitaire) (1)                                                                             | Ensuring qualified and motivated HRH.<br><br>Strengthening HRH planning.                                                                                           | Equitable distribution of HRH.                                                                                                                                                                                                                                      |               | Strengthen HRH training and continued professional development.              | Reduction in maternal and newborn mortality.                                                                    |
| <b>Benin</b> | Operational plan to reduce maternal and neonatal mortality in Benin 2018-2022 (Plan operationnel de reduction de la mortalite maternelle et neonatale au Benin) (2) | Recruitment of HRH (focus on obstetricians and gynaecologists, paediatricians, surgeons, intensive care anaesthetists and midwives).<br><br>Improve HRH retention. | Equitable distribution of HRH (focus on obstetricians and gynaecologists, paediatricians, surgeons, intensive care anaesthetists and midwives).<br><br>Hospitals approved for free caesarean sections must offer 24/7 Emergency Obstetric and Newborn Care (EmONC). |               | Improving the practice of midwives in order to acquire the necessary skills. | Reduction in maternal and newborn mortality.<br><br>Qualified human resources involved in MNH are insufficient. |
| <b>Benin</b> | National Health Policy 2018-2030                                                                                                                                    | Ensuring qualified HRH are available.                                                                                                                              | Equitable distribution of HRH.                                                                                                                                                                                                                                      |               | Ensuring motivated HRH.                                                      | Reduction in maternal and                                                                                       |

| Country       | Title of policy/<br>strategic<br>plan/year                                                      | Availability                                                                                | Accessibility                                                                                                                                                                                                     | Acceptability | Quality                                                                                                                             | Specific<br>reference to<br>MNH                       |
|---------------|-------------------------------------------------------------------------------------------------|---------------------------------------------------------------------------------------------|-------------------------------------------------------------------------------------------------------------------------------------------------------------------------------------------------------------------|---------------|-------------------------------------------------------------------------------------------------------------------------------------|-------------------------------------------------------|
|               | (Politique<br>Nationale de<br>Santé) (3)                                                        |                                                                                             |                                                                                                                                                                                                                   |               |                                                                                                                                     | newborn<br>mortality.                                 |
| <b>Malawi</b> | Health Sector<br>Strategic Plan<br>2011 - 2016.<br>Moving Towards<br>Equity and<br>Quality (4)  | Improve HRH<br>capacity.<br><br>Strengthen<br>recruitment.<br><br>Improve HRH<br>retention. | Improve access to<br>emergency<br>transport.                                                                                                                                                                      |               | Improve both<br>pre- and in-<br>service training<br>programmes.<br><br>Revise curricula.                                            | Reduction in<br>maternal and<br>newborn<br>mortality. |
| <b>Malawi</b> | Health Sector<br>Strategic Plan II<br>2017-2022.<br>Towards<br>Universal Health<br>Coverage (5) | Improve HRH<br>capacity, planning<br>and motivation.<br><br>Improve HRH<br>retention.       | Equitable<br>distribution of HRH.<br><br>Improve transport<br>systems.<br><br>Design options for<br>pooling health<br>financial resources<br>and implement<br>sustainable and<br>risk-based<br>financing schemes. |               | Improve quality<br>and<br>coordination of<br>training.<br><br>Enforce public<br>service policies,<br>regulations and<br>procedures. | Reduction in<br>maternal and<br>newborn<br>mortality. |
| <b>Malawi</b> | National Health<br>Policy - Towards<br>Universal Health                                         | Improve availability<br>of competent and<br>motivated HRH.                                  | Develop and<br>implement                                                                                                                                                                                          |               | Improve<br>coordination of<br>pre-and in-                                                                                           | Reduction in<br>maternal and                          |

| Country       | Title of policy/<br>strategic<br>plan/year                                              | Availability                                                                       | Accessibility                                                                                                                                                                  | Acceptability                                                                                                                                             | Quality                                                                                                                                                                                   | Specific<br>reference to<br>MNH                                                                                                                                                                             |
|---------------|-----------------------------------------------------------------------------------------|------------------------------------------------------------------------------------|--------------------------------------------------------------------------------------------------------------------------------------------------------------------------------|-----------------------------------------------------------------------------------------------------------------------------------------------------------|-------------------------------------------------------------------------------------------------------------------------------------------------------------------------------------------|-------------------------------------------------------------------------------------------------------------------------------------------------------------------------------------------------------------|
|               | Coverage 2018-2030 (6)                                                                  | Improve HRH retention.                                                             | appropriate referral systems.<br><br>Ensure that every sub-population has access to a health facility offering quality EHP (Essential Health Package) within a radius of 5 km. |                                                                                                                                                           | service training programmes to ensure competent HRH.<br><br>Improve HRH satisfaction and performance.                                                                                     | newborn mortality.                                                                                                                                                                                          |
| <b>Malawi</b> | Health Sector Strategic Plan III 2023-2030. Reforming for Universal Health Coverage (7) | Enhance recruitment, selection and deployment of HRH<br><br>Improve HRH retention. | Equitable distribution of HRH.<br><br>Improve transport and referral systems.                                                                                                  | Client centeredness: Service provision will be considerate of the people's personal circumstances, preferences, values, family situations and lifestyles. | Improve coordination of pre-and in-service training programmes to ensure competent HRH.<br><br>Enforce accreditation standards at training institutions and throughout the health sector. | Reduction in maternal and newborn mortality ("despite a high institutional delivery rate, the neonatal mortality rate has not declined, with most deaths occurring intrapartum or immediately postpartum"). |

| Country  | Title of policy/<br>strategic plan/year                                                | Availability                                                                      | Accessibility                                                                                                                                | Acceptability                                                                                                                                                         | Quality                                                                                     | Specific reference to MNH                                                                       |
|----------|----------------------------------------------------------------------------------------|-----------------------------------------------------------------------------------|----------------------------------------------------------------------------------------------------------------------------------------------|-----------------------------------------------------------------------------------------------------------------------------------------------------------------------|---------------------------------------------------------------------------------------------|-------------------------------------------------------------------------------------------------|
| Tanzania | The Tanzania Quality Improvement Framework in Health Care 2011-2016 (8)                | Improve availability of competent HRH and productivity.                           | Improve referral systems.<br><br>Equitable distribution of HRH.                                                                              | Address community health problems.                                                                                                                                    | Strengthening supportive supervision, monitoring and surveillance of HRH.                   | Reduction in maternal and infant mortality.                                                     |
| Tanzania | Health Sector Strategic Plan July 2015 - June 2020 (HSSP IV) (9)                       | Increase HRH capacity.                                                            | Equitable distribution of HRH (focus on geographical areas with highest disease burden and focusing on vulnerable groups with higher risks). | Meet the expectations of the population in health care service.<br><br>Employ a human rights-based approach in health programmes - revitalising the Client's Charter. | Performance management of staff.                                                            | Reduction in maternal and newborn mortality. Increase access to skilled care during childbirth. |
| Tanzania | Health Sector Strategic Plan July 2021 - June 2026 (HSSP V) Leaving No One Behind (10) | Improve availability and capacity of competent HRH.<br><br>Improve HRH retention. | Equitable distribution of HRH (focus on geographical areas with highest disease burden,                                                      | Provide people-centred care.<br><br>Improving the practice of nursing and                                                                                             | Improving pre-service training, continuing professional development (CPD), and a mentorship | Reduction in maternal and infant mortality and ensure well-being.                               |

| Country       | Title of policy/<br>strategic<br>plan/year             | Availability                                                                                                                                                                   | Accessibility                                                                                                            | Acceptability                                                                                                                                                                                                 | Quality                                                                                                                                                                                                                | Specific<br>reference to<br>MNH                                                         |
|---------------|--------------------------------------------------------|--------------------------------------------------------------------------------------------------------------------------------------------------------------------------------|--------------------------------------------------------------------------------------------------------------------------|---------------------------------------------------------------------------------------------------------------------------------------------------------------------------------------------------------------|------------------------------------------------------------------------------------------------------------------------------------------------------------------------------------------------------------------------|-----------------------------------------------------------------------------------------|
|               |                                                        |                                                                                                                                                                                | gender and<br>disability).<br><br>Remove financial<br>barriers in<br>accessing care.<br><br>Improve referral<br>systems. | midwifery<br>ensuring<br>respectful care.                                                                                                                                                                     | system in<br>clinical settings.                                                                                                                                                                                        |                                                                                         |
| <b>Uganda</b> | Second National<br>Health Policy<br>(NHP II) 2010 (11) | Strengthen HRH<br>planning.<br><br>Produce, recruit and<br>retain motivated<br>HRH with<br>appropriate<br>professional skill mix<br>in partnership with<br>the private sector. |                                                                                                                          | Strengthen<br>enforcement<br>of professional<br>standards and<br>develop<br>effective ways<br>of increasing<br>health workers<br>accountability<br>towards client<br>communities<br>and ethical<br>behaviour. | Review<br>curricula and<br>training<br>strategies<br>enhancing HRH<br>competence.<br><br>Strengthen<br>supportive<br>supervision and<br>performance<br>management<br>for both public<br>and private<br>health workers. | The minimum<br>health care<br>package<br>including for<br>maternal and<br>child health. |
| <b>Uganda</b> | Health Sector<br>Quality<br>Improvement                |                                                                                                                                                                                |                                                                                                                          | Promote<br>transparency<br>and                                                                                                                                                                                | Develop HRH<br>skills to deliver<br>quality care and                                                                                                                                                                   | Reduction in<br>maternal<br>mortality.                                                  |

| Country | Title of policy/<br>strategic<br>plan/year                 | Availability | Accessibility | Acceptability                                                                                                                  | Quality                                                                                                                                                                                                                     | Specific<br>reference to<br>MNH |
|---------|------------------------------------------------------------|--------------|---------------|--------------------------------------------------------------------------------------------------------------------------------|-----------------------------------------------------------------------------------------------------------------------------------------------------------------------------------------------------------------------------|---------------------------------|
|         | Framework and<br>Strategic Plan<br>2015/16-2019/20<br>(12) |              |               | <p>accountability<br/>of health<br/>providers<br/>through the<br/>client charters.</p> <p>Improve client<br/>centred care.</p> | <p>increase uptake<br/>and use of<br/>guidelines and<br/>clinical<br/>standards.</p> <p>Strengthen<br/>regulatory<br/>bodies – ethics<br/>and code of<br/>conduct<br/>(including for<br/>private health<br/>providers).</p> |                                 |

| Country | Title of policy/<br>strategic<br>plan/year                             | Availability                                                                                                                                                               | Accessibility                                                                                                                                    | Acceptability | Quality                                                                                                                                                                                                                                                                         | Specific<br>reference to<br>MNH                      |
|---------|------------------------------------------------------------------------|----------------------------------------------------------------------------------------------------------------------------------------------------------------------------|--------------------------------------------------------------------------------------------------------------------------------------------------|---------------|---------------------------------------------------------------------------------------------------------------------------------------------------------------------------------------------------------------------------------------------------------------------------------|------------------------------------------------------|
| Uganda  | Health Sector<br>Development<br>Plan 2015/2016 -<br>2019/20 (13)       | Produce, recruit and<br>retain motivated<br>HRH with<br>appropriate<br>professional skill mix<br>(especially super<br>specialized cadres).<br><br>Reducing<br>absenteeism. | To improve access<br>to quality hospital<br>services at all levels<br>in both the public<br>and private sectors.<br>Improve referral<br>systems. |               | Harmonize<br>education<br>standards and<br>monitoring<br>tools for both<br>public and<br>private health<br>training<br>institutions.<br><br>Expanding<br>access to CPD<br>programmes.<br><br>Strengthen<br>strategies for<br>rewards and<br>sanctions of<br>HRH<br>performance. | Reduction in<br>maternal and<br>infant<br>mortality. |
| Uganda  | Strategy for<br>Improving Health<br>Service Delivery<br>2016-2021 (14) | Reducing<br>absenteeism.                                                                                                                                                   |                                                                                                                                                  |               | Develop a<br>standard<br>criterion of<br>entry for all<br>cadres of health<br>professionals                                                                                                                                                                                     |                                                      |

| Country       | Title of policy/<br>strategic<br>plan/year               | Availability                                                                                                                                                                                            | Accessibility | Acceptability                | Quality                                                                                                                                                                                                      | Specific<br>reference to<br>MNH |
|---------------|----------------------------------------------------------|---------------------------------------------------------------------------------------------------------------------------------------------------------------------------------------------------------|---------------|------------------------------|--------------------------------------------------------------------------------------------------------------------------------------------------------------------------------------------------------------|---------------------------------|
|               |                                                          |                                                                                                                                                                                                         |               |                              | for pre-service training.<br><br>Regulate intake into the pre-service Health Training Schools to match existing training capacity.                                                                           |                                 |
| <b>Uganda</b> | Ministry of Health Strategic Plan 2020/21 - 2024/25 (15) | Produce, recruit and retain motivated HRH with appropriate professional skill mix (especially super specialized cadres).<br><br>Strengthen HRH management and development.<br><br>Reducing absenteeism. |               | Enhance client-centeredness. | Due to weaknesses in performance and productivity, and the need for sustainable improvements in health services, the HRH needs to be transformed to enhance professionalism, accountability, mindset-change. |                                 |



| Country | Title of policy/<br>strategic<br>plan/year                               | Availability | Accessibility | Acceptability                                                                           | Quality                                                                                                                                                                                                                          | Specific<br>reference to<br>MNH  |
|---------|--------------------------------------------------------------------------|--------------|---------------|-----------------------------------------------------------------------------------------|----------------------------------------------------------------------------------------------------------------------------------------------------------------------------------------------------------------------------------|----------------------------------|
| Uganda  | National Quality Improvement Framework and Strategic Plan 2021-2025 (16) |              |               | <p>Improve client-centred care at all levels.</p> <p>Improved community engagement.</p> | <p>Develop relevant structures, tools, and a mechanism for accreditation of both public and private health facilities.</p> <p>Improve HRH capacity related to quality improvement including use of guidelines and protocols.</p> | Reduction in maternal mortality. |

## References

1. Ministry of Health Benin. National Health Development Plan 2009-2018 (Plan National de Development Sanitaire). Cotonou, Benin; 2009.
2. Ministry of Health Benin. Operational plan to reduce maternal and neonatal mortality in Benin 2018-2022 (Plan operationnel de reduction de la mortalite maternelle et neonatale au Benin). Cotonou, Benin; 2018.
3. Ministry of Health Benin. National Health Policy 2018-2030 (Politique Nationale de Santé). Cotonou, Benin; 2018.
4. Ministry of Health Malawi. Health Sector Strategic Plan 2011 - 2016. Moving Towards Equity and Quality. Lilongwe, Malawi; 2011.
5. Ministry of Health Malawi. Health Sector Strategic Plan II 2017-2022. Towards Universal Health Coverage. Lilongwe, Malawi; 2017.
6. Ministry of Health Malawi. National Health Policy - Towards Universal Health Coverage 2018-2030. Lilongwe, Malawi; 2018.

7. Ministry of Health Malawi. Health Sector Strategic Plan III 2023-2030. Reforming for Universal Health Coverage. Lilongwe, Malawi; 2022.
8. Ministry of Health and Social Welfare United Republic of Tanzania. The Tanzania Quality Improvement Framework in Health Care 2011-2016. Dar es Salaam; Tanzania; 2011.
9. Ministry of Health and Social Welfare United Republic of Tanzania. Health Sector Strategic Plan July 2015 - June 2020 (HSSP IV). Dar es Salaam; Tanzania; 2015.
10. Ministry of Health and Social Welfare United Republic of Tanzania. Health Sector Strategic Plan July 2021 - June 2026 (HSSP V) Leaving No One Behind. Dar es Salaam; Tanzania; 2021.
11. Ministry of Health Uganda. Second National Health Policy (NHP II) 2010. Kampala, Uganda; 2010.
12. Ministry of Health Uganda. Health Sector Quality Improvement Framework and Strategic Plan 2015/16-2019/20. Kampala, Uganda; 2015.
13. Ministry of Health Uganda. Health Sector Development Plan 2015/2016 -2019/20. Kampala, Uganda; 2015.
14. Ministry of Health Uganda. Strategy for Improving Health Service Delivery 2016-2021. Kampala, Uganda; 2016.
15. Ministry of Health Uganda. Ministry of Health Strategic Plan 2020/21-2024/25. Kampala, Uganda; 2020.
16. Ministry of Health Uganda. National Quality Improvement Framework and Strategic Plan 2021-2025. Kampala, Uganda; 2021.
