# Supplementary material for: Human resources for maternal and newborn health in Benin, Malawi, Tanzania and Uganda: a policy process-tracing analysis
Source: Research Square preprint supplement (doi:10.21203/rs.3.rs-7337394/v1), 2025-09-15
Supplement: Supplementary file 2 [file 224ff95fe8ef552e571a5f18.pdf]

## PRISMA flow diagram

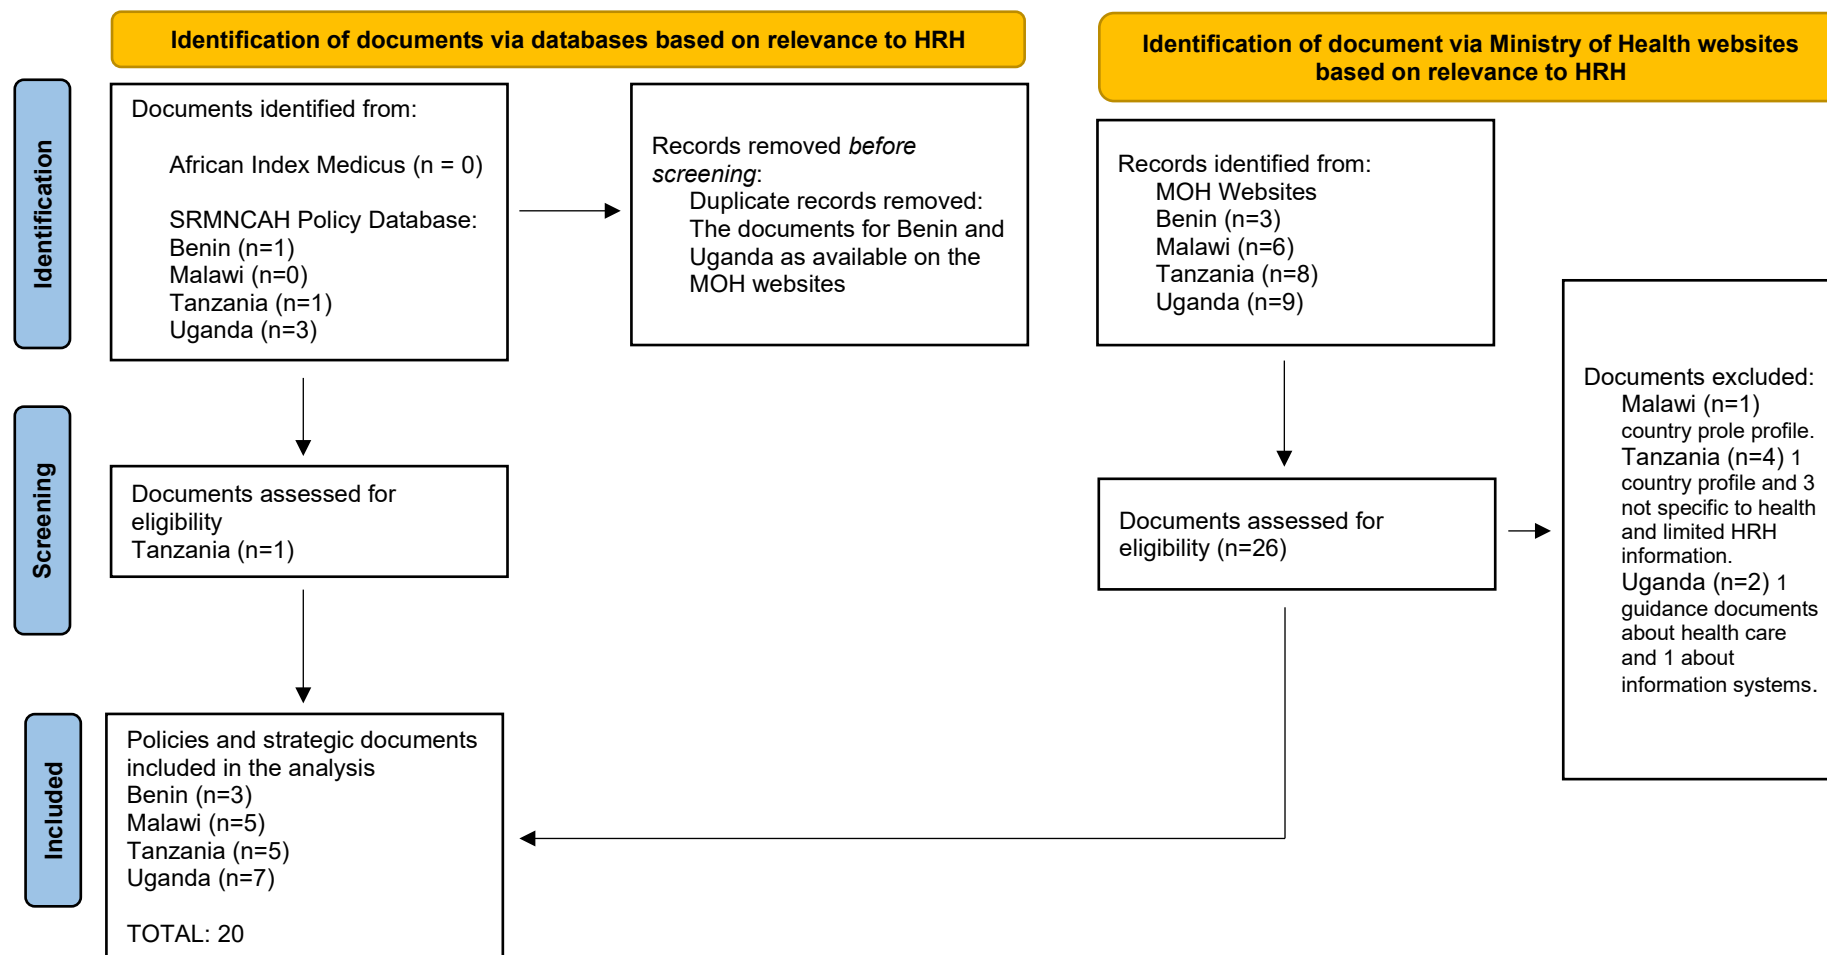

Adopted from: Page MJ, McKenzie JE, Bossuyt PM, Boutron I, Hoffmann TC, Mulrow CD, et al. The PRISMA 2020 statement: an updated guideline for reporting systematic reviews. BMJ 2021;372:n71. doi: 10.1136/bmj.n71. For more information, visit: <http://www.prisma-statement.org/>
